# Supplementary material
Source: publisher figshare collection journal article supplement (https://wiley.figshare.com/ndownloader/files/14535122)
Supplement: Supplementary file 1 [file 14535122]

## Sheet: Fig. 1A
Time (hours)	Number of cells in groups	Total number of cells	Proportion of cells in groups	Treatment
0	0	172	0	Daphnia supernatant
0	0	119	0	Daphnia supernatant
0	0	49	0	Daphnia supernatant
0	0	47	0	Daphnia supernatant
0	0	47	0	Daphnia supernatant
0	0	99	0	Daphnia supernatant
0	0	103	0	Daphnia supernatant
0	0	110	0	Daphnia supernatant
0	0	114	0	Daphnia supernatant
0	0	122	0	Daphnia supernatant
0	0	126	0	Daphnia supernatant
0	0	105	0	Daphnia supernatant
0	0	118	0	Daphnia supernatant
0	0	113	0	Daphnia supernatant
0	0	107	0	Daphnia supernatant
0	0	53	0	Filtered media
0	0	35	0	Filtered media
0	0	58	0	Filtered media
0	0	32	0	Filtered media
0	0	66	0	Filtered media
0	0	109	0	Filtered media
0	0	89	0	Filtered media
0	0	89	0	Filtered media
0	0	105	0	Filtered media
0	3	89	0.0337079	Filtered media
0	0	99	0	Filtered media
0	0	104	0	Filtered media
0	0	94	0	Filtered media
0	0	105	0	Filtered media
0	0	99	0	Filtered media
0	13	51	0.254902	Ochromonas supernatant
0	0	86	0	Ochromonas supernatant
0	0	54	0	Ochromonas supernatant
0	0	46	0	Ochromonas supernatant
0	0	50	0	Ochromonas supernatant
0	0	81	0	Ochromonas supernatant
0	0	106	0	Ochromonas supernatant
0	0	97	0	Ochromonas supernatant
0	0	108	0	Ochromonas supernatant
0	0	79	0	Ochromonas supernatant
0	0	93	0	Ochromonas supernatant
0	0	129	0	Ochromonas supernatant
0	0	84	0	Ochromonas supernatant
0	0	96	0	Ochromonas supernatant
0	0	85	0	Ochromonas supernatant
0	0	34	0	Ochromonas predators
0	0	41	0	Ochromonas predators
0	0	54	0	Ochromonas predators
0	0	33	0	Ochromonas predators
0	0	42	0	Ochromonas predators
0	0	33	0	Ochromonas predators
0	0	107	0	Ochromonas predators
0	0	21	0	Ochromonas predators
0	0	27	0	Ochromonas predators
0	0	39	0	Ochromonas predators
0	0	112	0	Ochromonas predators
0	0	89	0	Ochromonas predators
0	0	103	0	Ochromonas predators
0	0	143	0	Ochromonas predators
0	0	128	0	Ochromonas predators
24	8	49	0.163265	Daphnia supernatant
24	29	90	0.322222	Daphnia supernatant
24	3	23	0.130435	Daphnia supernatant
24	7	36	0.194444	Daphnia supernatant
24	21	64	0.328125	Daphnia supernatant
24	124	170	0.729412	Daphnia supernatant
24	55	97	0.56701	Daphnia supernatant
24	75	113	0.663717	Daphnia supernatant
24	32	71	0.450704	Daphnia supernatant
24	75	108	0.694444	Daphnia supernatant
24	48	84	0.571429	Daphnia supernatant
24	62	105	0.590476	Daphnia supernatant
24	55	103	0.533981	Daphnia supernatant
24	48	95	0.505263	Daphnia supernatant
24	46	80	0.575	Daphnia supernatant
24	0	16	0	Filtered media
24	0	18	0	Filtered media
24	0	15	0	Filtered media
24	0	17	0	Filtered media
24	0	12	0	Filtered media
24	0	81	0	Filtered media
24	3	92	0.0326087	Filtered media
24	0	102	0	Filtered media
24	4	68	0.0588235	Filtered media
24	7	108	0.0648148	Filtered media
24	12	72	0.166667	Filtered media
24	0	104	0	Filtered media
24	3	111	0.027027	Filtered media
24	5	72	0.0694444	Filtered media
24	4	80	0.05	Filtered media
24	65	279	0.232975	Ochromonas supernatant
24	6	39	0.153846	Ochromonas supernatant
24	0	27	0	Ochromonas supernatant
24	0	47	0	Ochromonas supernatant
24	4	58	0.0689655	Ochromonas supernatant
24	0	82	0	Ochromonas supernatant
24	0	90	0	Ochromonas supernatant
24	3	81	0.037037	Ochromonas supernatant
24	0	130	0	Ochromonas supernatant
24	6	98	0.0612245	Ochromonas supernatant
24	0	87	0	Ochromonas supernatant
24	4	79	0.0506329	Ochromonas supernatant
24	3	95	0.0315789	Ochromonas supernatant
24	11	114	0.0964912	Ochromonas supernatant
24	0	97	0	Ochromonas supernatant
24	0	15	0	Ochromonas predators
24	14	23	0.608696	Ochromonas predators
24	0	15	0	Ochromonas predators
24	0	15	0	Ochromonas predators
24	8	21	0.380952	Ochromonas predators
24	5	21	0.238095	Ochromonas predators
24	12	29	0.413793	Ochromonas predators
24	9	16	0.5625	Ochromonas predators
24	3	18	0.166667	Ochromonas predators
24	3	16	0.1875	Ochromonas predators
24	18	66	0.272727	Ochromonas predators
24	30	74	0.405405	Ochromonas predators
24	12	49	0.244898	Ochromonas predators
24	27	83	0.325301	Ochromonas predators
24	26	44	0.590909	Ochromonas predators
24

## Sheet: Fig. 2A
Time (hours)	Number of cells in groups	Total number of cells	Proportion of cells in groups	Treatment
0	0	19	0	No predators_No supernatant
0	0	22	0	No predators_No supernatant
0	0	15	0	No predators_No supernatant
0	0	16	0	No predators_No supernatant
0	0	19	0	No predators_No supernatant
0	0	17	0	No predators_No supernatant
0	0	12	0	No predators_No supernatant
0	0	16	0	No predators_No supernatant
0	0	19	0	No predators_No supernatant
0	0	18	0	No predators_No supernatant
0	0	8	0	No predators_No supernatant
0	0	13	0	No predators_No supernatant
0	0	23	0	No predators_No supernatant
0	0	23	0	No predators_No supernatant
0	0	29	0	No predators_No supernatant
0	0	14	0	No predators_No supernatant
0	4	23	0.173913	No predators_No supernatant
0	0	24	0	No predators_No supernatant
0	0	13	0	No predators_No supernatant
0	0	18	0	No predators_No supernatant
0	0	20	0	No predators_No supernatant
0	0	14	0	No predators_No supernatant
0	0	13	0	No predators_No supernatant
0	0	30	0	No predators_No supernatant
0	0	23	0	No predators_No supernatant
0	0	24	0	No predators_No supernatant
0	0	29	0	No predators_No supernatant
0	0	38	0	No predators_No supernatant
0	0	27	0	No predators_No supernatant
0	0	21	0	No predators_No supernatant
0	0	10	0	Ochromonas predators_No supernatant
0	0	6	0	Ochromonas predators_No supernatant
0	0	18	0	Ochromonas predators_No supernatant
0	0	21	0	Ochromonas predators_No supernatant
0	0	10	0	Ochromonas predators_No supernatant
0	0	20	0	Ochromonas predators_No supernatant
0	0	13	0	Ochromonas predators_No supernatant
0	0	15	0	Ochromonas predators_No supernatant
0	0	10	0	Ochromonas predators_No supernatant
0	0	16	0	Ochromonas predators_No supernatant
0	0	18	0	Ochromonas predators_No supernatant
0	0	23	0	Ochromonas predators_No supernatant
0	0	22	0	Ochromonas predators_No supernatant
0	0	18	0	Ochromonas predators_No supernatant
0	0	30	0	Ochromonas predators_No supernatant
0	0	22	0	Ochromonas predators_No supernatant
0	0	25	0	Ochromonas predators_No supernatant
0	0	25	0	Ochromonas predators_No supernatant
0	0	26	0	Ochromonas predators_No supernatant
0	3	32	0.09375	Ochromonas predators_No supernatant
0	0	27	0	Ochromonas predators_No supernatant
0	0	21	0	Ochromonas predators_No supernatant
0	0	24	0	Ochromonas predators_No supernatant
0	0	26	0	Ochromonas predators_No supernatant
0	0	22	0	Ochromonas predators_No supernatant
0	0	26	0	Ochromonas predators_No supernatant
0	0	24	0	Ochromonas predators_No supernatant
0	0	29	0	Ochromonas predators_No supernatant
0	0	24	0	Ochromonas predators_No supernatant
0	0	23	0	Ochromonas predators_No supernatant
0	5	20	0.25	No predators_Daphnia supernatant
0	0	9	0	No predators_Daphnia supernatant
0	5	17	0.294118	No predators_Daphnia supernatant
0	0	14	0	No predators_Daphnia supernatant
0	0	10	0	No predators_Daphnia supernatant
0	0	23	0	No predators_Daphnia supernatant
0	0	11	0	No predators_Daphnia supernatant
0	0	11	0	No predators_Daphnia supernatant
0	7	17	0.411765	No predators_Daphnia supernatant
0	0	11	0	No predators_Daphnia supernatant
0	0	8	0	No predators_Daphnia supernatant
0	0	14	0	No predators_Daphnia supernatant
0	0	13	0	No predators_Daphnia supernatant
0	12	23	0.521739	No predators_Daphnia supernatant
0	12	27	0.444444	No predators_Daphnia supernatant
0	10	33	0.30303	No predators_Daphnia supernatant
0	8	20	0.4	No predators_Daphnia supernatant
0	7	22	0.318182	No predators_Daphnia supernatant
0	9	33	0.272727	No predators_Daphnia supernatant
0	18	25	0.72	No predators_Daphnia supernatant
0	0	24	0	No predators_Daphnia supernatant
0	5	26	0.192308	No predators_Daphnia supernatant
0	16	32	0.5	No predators_Daphnia supernatant
0	14	23	0.608696	No predators_Daphnia supernatant
0	7	17	0.411765	No predators_Daphnia supernatant
0	4	18	0.222222	No predators_Daphnia supernatant
0	0	19	0	No predators_Daphnia supernatant
0	23	32	0.71875	No predators_Daphnia supernatant
0	0	15	0	No predators_Daphnia supernatant
0	0	22	0	No predators_Daphnia supernatant
0	0	11	0	Ochromonas predators_Daphnia supernatant
0	0	6	0	Ochromonas predators_Daphnia supernatant
0	0	7	0	Ochromonas predators_Daphnia supernatant
0	0	13	0	Ochromonas predators_Daphnia supernatant
0	0	16	0	Ochromonas predators_Daphnia supernatant
0	0	18	0	Ochromonas predators_Daphnia supernatant
0	3	15	0.2	Ochromonas predators_Daphnia supernatant
0	10	22	0.454545	Ochromonas predators_Daphnia supernatant
0	0	11	0	Ochromonas predators_Daphnia supernatant
0	0	14	0	Ochromonas predators_Daphnia supernatant
0	0	24	0	Ochromonas predators_Daphnia supernatant
0	0	17	0	Ochromonas predators_Daphnia supernatant
0	0	12	0	Ochromonas predators_Daphnia supernatant
0	18	27	0.666667	Ochromonas predators_Daphnia supernatant
0	13	26	0.5	Ochromonas predators_Daphnia supernatant
0	5	17	0.294118	Ochromonas predators_Daphnia supernatant
0	14	23	0.608696	Ochromonas predators_Daphnia supernatant
0	7	20	0.35	Ochromonas predators_Daphnia supernatant
0	14	29	0.482759	Ochromonas predators_Daphnia supernatant
0	15	22	0.681818	Ochromonas predators_Daphnia supernatant
0	19	26	0.730769	Ochromonas predators_Daphnia supernatant
0	14	25	0.56	Ochromonas predators_Daphnia supernatant
0	3	11	0.272727	Ochromonas predators_Daphnia supernatant
0	17	31	0.548387	Ochromonas predators_Daphnia supernatant
0	0	19	0	Ochromonas predators_Daphnia supernatant
0	24	38	0.631579	Ochromonas predators_Daphnia supernatant
0	0	11	0	Ochromonas predators_Daphnia supernatant
0	13	26	0.5	Ochromonas predators_Daphnia supernatant
0	19	25	0.76	Ochromonas predators_Daphnia supernatant
0	11	26	0.423077	Ochromonas predators_Daphnia supernatant
3	0	16	0	No predators_No supernatant
3	0	12	0	No predators_No supernatant
3	0	17	0	No predators_No supernatant
3	0	15	0	No predators_No supernatant
3	0	15	0	No predators_No supernatant
3	0	20	0	No predators_No supernatant
3	0	14	0	No predators_No supernatant
3	0	17	0	No predators_No supernatant
3	0	12	0	No predators_No supernatant
3	0	11	0	No predators_No supernatant
3	0	12	0	No predators_No supernatant
3	0	13	0	No predators_No supernatant
3	0	28	0	No predators_No supernatant
3	0	28	0	No predators_No supernatant
3	0	26	0	No predators_No supernatant
3	3	30	0.1	No predators_No supernatant
3	0	31	0	No predators_No supernatant
3	0	27	0	No predators_No supernatant
3	0	32	0	No predators_No supernatant
3	0	26	0	No predators_No supernatant
3	0	33	0	No predators_No supernatant
3	0	24	0	No predators_No supernatant
3	0	27	0	No predators_No supernatant
3	0	22	0	No predators_No supernatant
3	0	27	0	No predators_No supernatant
3	0	30	0	No predators_No supernatant
3	0	22	0	No predators_No supernatant
3	0	17	0	No predators_No supernatant
3	0	22	0	No predators_No supernatant
3	0	23	0	No predators_No supernatant
3	0	9	0	Ochromonas predators_No supernatant
3	0	11	0	Ochromonas predators_No supernatant
3	0	20	0	Ochromonas predators_No supernatant
3	0	14	0	Ochromonas predators_No supernatant
3	0	14	0	Ochromonas predators_No supernatant
3	0	4	0	Ochromonas predators_No supernatant
3	0	17	0	Ochromonas predators_No supernatant
3	0	10	0	Ochromonas predators_No supernatant
3	0	7	0	Ochromonas predators_No supernatant
3	0	9	0	Ochromonas predators_No supernatant
3	0	10	0	Ochromonas predators_No supernatant
3	0	11	0	Ochromonas predators_No supernatant
3	0	16	0	Ochromonas predators_No supernatant
3	0	10	0	Ochromonas predators_No supernatant
3	0	14	0	Ochromonas predators_No supernatant
3	0	20	0	Ochromonas predators_No supernatant
3	0	16	0	Ochromonas predators_No supernatant
3	0	16	0	Ochromonas predators_No supernatant
3	0	14	0	Ochromonas predators_No supernatant
3	0	12	0	Ochromonas predators_No supernatant
3	0	20	0	Ochromonas predators_No supernatant
3	0	18	0	Ochromonas predators_No supernatant
3	0	24	0	Ochromonas predators_No supernatant
3	0	16	0	Ochromonas predators_No supernatant
3	0	13	0	Ochromonas predators_No supernatant
3	0	15	0	Ochromonas predators_No supernatant
3	0	20	0	Ochromonas predators_No supernatant
3	0	16	0	Ochromonas predators_No supernatant
3	0	15	0	Ochromonas predators_No supernatant
3	0	20	0	Ochromonas predators_No supernatant
3	8	19	0.421053	No predators_Daphnia supernatant
3	7	21	0.333333	No predators_Daphnia supernatant
3	0	5	0	No predators_Daphnia supernatant
3	4	8	0.5	No predators_Daphnia supernatant
3	11	21	0.52381	No predators_Daphnia supernatant
3	12	30	0.4	No predators_Daphnia supernatant
3	0	10	0	No predators_Daphnia supernatant
3	0	8	0	No predators_Daphnia supernatant
3	0	10	0	No predators_Daphnia supernatant
3	0	8	0	No predators_Daphnia supernatant
3	0	29	0	No predators_Daphnia supernatant
3	0	12	0	No predators_Daphnia supernatant
3	12	29	0.413793	No predators_Daphnia supernatant
3	9	19	0.473684	No predators_Daphnia supernatant
3	16	29	0.551724	No predators_Daphnia supernatant
3	10	18	0.555556	No predators_Daphnia supernatant
3	11	39	0.282051	No predators_Daphnia supernatant
3	19	36	0.527778	No predators_Daphnia supernatant
3	10	32	0.3125	No predators_Daphnia supernatant
3	0	23	0	No predators_Daphnia supernatant
3	5	20	0.25	No predators_Daphnia supernatant
3	12	22	0.545455	No predators_Daphnia supernatant
3	13	27	0.481481	No predators_Daphnia supernatant
3	9	32	0.28125	No predators_Daphnia supernatant
3	14	24	0.583333	No predators_Daphnia supernatant
3	18	33	0.545455	No predators_Daphnia supernatant
3	11	22	0.5	No predators_Daphnia supernatant
3	8	18	0.444444	No predators_Daphnia supernatant
3	14	28	0.5	No predators_Daphnia supernatant
3	15	24	0.625	No predators_Daphnia supernatant
3	3	15	0.2	Ochromonas predators_Daphnia supernatant
3	0	17	0	Ochromonas predators_Daphnia supernatant
3	3	19	0.157895	Ochromonas predators_Daphnia supernatant
3	0	21	0	Ochromonas predators_Daphnia supernatant
3	0	20	0	Ochromonas predators_Daphnia supernatant
3	0	13	0	Ochromonas predators_Daphnia supernatant
3	0	11	0	Ochromonas predators_Daphnia supernatant
3	0	15	0	Ochromonas predators_Daphnia supernatant
3	0	16	0	Ochromonas predators_Daphnia supernatant
3	0	9	0	Ochromonas predators_Daphnia supernatant
3	0	13	0	Ochromonas predators_Daphnia supernatant
3	0	9	0	Ochromonas predators_Daphnia supernatant
3	11	20	0.55	Ochromonas predators_Daphnia supernatant
3	21	41	0.517241	Ochromonas predators_Daphnia supernatant
3	11	20	0.55	Ochromonas predators_Daphnia supernatant
3	13	29	0.448276	Ochromonas predators_Daphnia supernatant
3	16	30	0.533333	Ochromonas predators_Daphnia supernatant
3	11	28	0.392857	Ochromonas predators_Daphnia supernatant
3	14	33	0.424242	Ochromonas predators_Daphnia supernatant
3	13	20	0.65	Ochromonas predators_Daphnia supernatant
3	16	27	0.592593	Ochromonas predators_Daphnia supernatant
3	32	45	0.711111	Ochromonas predators_Daphnia supernatant
3	9	22	0.409091	Ochromonas predators_Daphnia supernatant
3	12	21	0.571429	Ochromonas predators_Daphnia supernatant
3	11	26	0.423077	Ochromonas predators_Daphnia supernatant
3	13	23	0.565217	Ochromonas predators_Daphnia supernatant
3	13	28	0.464286	Ochromonas predators_Daphnia supernatant
3	18	24	0.75	Ochromonas predators_Daphnia supernatant
3	15	36	0.416667	Ochromonas predators_Daphnia supernatant
3	15	24	0.625	Ochromonas predators_Daphnia supernatant

## Sheet: Fig. 2B
Time (hours)	Total algae	Treatment	Total algae are presented in all graphs as cells/mL by using this equation which reverts cells in the microscope image to cells/mL: Total algae = (Total number of cells in the microscope image * 2 * 10^5)/5.33
0	712946	No predators_Unicellular
0	825516	No predators_Unicellular
0	562852	No predators_Unicellular
0	600375	No predators_Unicellular
0	712946	No predators_Unicellular
0	637899	No predators_Unicellular
0	450281	No predators_Unicellular
0	600375	No predators_Unicellular
0	712946	No predators_Unicellular
0	675422	No predators_Unicellular
0	300188	No predators_Unicellular
0	487805	No predators_Unicellular
0	863039	No predators_Unicellular
0	863039	No predators_Unicellular
0	1088180	No predators_Unicellular
0	525328	No predators_Unicellular
0	863039	No predators_Unicellular
0	900563	No predators_Unicellular
0	487805	No predators_Unicellular
0	675422	No predators_Unicellular
0	750469	No predators_Unicellular
0	525328	No predators_Unicellular
0	487805	No predators_Unicellular
0	1125704	No predators_Unicellular
0	863039	No predators_Unicellular
0	900563	No predators_Unicellular
0	1088180	No predators_Unicellular
0	1425891	No predators_Unicellular
0	1013133	No predators_Unicellular
0	787992	No predators_Unicellular
0	375235	Ochromonas predators_Unicellular
0	225141	Ochromonas predators_Unicellular
0	675422	Ochromonas predators_Unicellular
0	787992	Ochromonas predators_Unicellular
0	375235	Ochromonas predators_Unicellular
0	750469	Ochromonas predators_Unicellular
0	487805	Ochromonas predators_Unicellular
0	562852	Ochromonas predators_Unicellular
0	375235	Ochromonas predators_Unicellular
0	600375	Ochromonas predators_Unicellular
0	675422	Ochromonas predators_Unicellular
0	863039	Ochromonas predators_Unicellular
0	825516	Ochromonas predators_Unicellular
0	675422	Ochromonas predators_Unicellular
0	1125704	Ochromonas predators_Unicellular
0	825516	Ochromonas predators_Unicellular
0	938086	Ochromonas predators_Unicellular
0	938086	Ochromonas predators_Unicellular
0	975610	Ochromonas predators_Unicellular
0	1200750	Ochromonas predators_Unicellular
0	1013133	Ochromonas predators_Unicellular
0	787992	Ochromonas predators_Unicellular
0	900563	Ochromonas predators_Unicellular
0	975610	Ochromonas predators_Unicellular
0	825516	Ochromonas predators_Unicellular
0	975610	Ochromonas predators_Unicellular
0	900563	Ochromonas predators_Unicellular
0	1088180	Ochromonas predators_Unicellular
0	900563	Ochromonas predators_Unicellular
0	863039	Ochromonas predators_Unicellular
0	750469	No predators_Multicellular
0	337711	No predators_Multicellular
0	637899	No predators_Multicellular
0	525328	No predators_Multicellular
0	375235	No predators_Multicellular
0	863039	No predators_Multicellular
0	412758	No predators_Multicellular
0	412758	No predators_Multicellular
0	637899	No predators_Multicellular
0	412758	No predators_Multicellular
0	300188	No predators_Multicellular
0	525328	No predators_Multicellular
0	487805	No predators_Multicellular
0	863039	No predators_Multicellular
0	1013133	No predators_Multicellular
0	1238274	No predators_Multicellular
0	750469	No predators_Multicellular
0	825516	No predators_Multicellular
0	1238274	No predators_Multicellular
0	938086	No predators_Multicellular
0	900563	No predators_Multicellular
0	975610	No predators_Multicellular
0	1200750	No predators_Multicellular
0	863039	No predators_Multicellular
0	637899	No predators_Multicellular
0	675422	No predators_Multicellular
0	712946	No predators_Multicellular
0	1200750	No predators_Multicellular
0	562852	No predators_Multicellular
0	825516	No predators_Multicellular
0	412758	Ochromonas predators_Multicellular
0	225141	Ochromonas predators_Multicellular
0	262664	Ochromonas predators_Multicellular
0	487805	Ochromonas predators_Multicellular
0	600375	Ochromonas predators_Multicellular
0	675422	Ochromonas predators_Multicellular
0	562852	Ochromonas predators_Multicellular
0	825516	Ochromonas predators_Multicellular
0	412758	Ochromonas predators_Multicellular
0	525328	Ochromonas predators_Multicellular
0	900563	Ochromonas predators_Multicellular
0	637899	Ochromonas predators_Multicellular
0	450281	Ochromonas predators_Multicellular
0	1013133	Ochromonas predators_Multicellular
0	975610	Ochromonas predators_Multicellular
0	637899	Ochromonas predators_Multicellular
0	863039	Ochromonas predators_Multicellular
0	750469	Ochromonas predators_Multicellular
0	1088180	Ochromonas predators_Multicellular
0	825516	Ochromonas predators_Multicellular
0	975610	Ochromonas predators_Multicellular
0	938086	Ochromonas predators_Multicellular
0	412758	Ochromonas predators_Multicellular
0	1163227	Ochromonas predators_Multicellular
0	712946	Ochromonas predators_Multicellular
0	1425891	Ochromonas predators_Multicellular
0	412758	Ochromonas predators_Multicellular
0	975610	Ochromonas predators_Multicellular
0	938086	Ochromonas predators_Multicellular
0	975610	Ochromonas predators_Multicellular
3	600375	No predators_Unicellular
3	450281	No predators_Unicellular
3	637899	No predators_Unicellular
3	562852	No predators_Unicellular
3	562852	No predators_Unicellular
3	750469	No predators_Unicellular
3	525328	No predators_Unicellular
3	637899	No predators_Unicellular
3	450281	No predators_Unicellular
3	412758	No predators_Unicellular
3	450281	No predators_Unicellular
3	487805	No predators_Unicellular
3	1050657	No predators_Unicellular
3	1050657	No predators_Unicellular
3	975610	No predators_Unicellular
3	1125704	No predators_Unicellular
3	1163227	No predators_Unicellular
3	1013133	No predators_Unicellular
3	1200750	No predators_Unicellular
3	975610	No predators_Unicellular
3	1238274	No predators_Unicellular
3	900563	No predators_Unicellular
3	1013133	No predators_Unicellular
3	825516	No predators_Unicellular
3	1013133	No predators_Unicellular
3	1125704	No predators_Unicellular
3	825516	No predators_Unicellular
3	637899	No predators_Unicellular
3	825516	No predators_Unicellular
3	863039	No predators_Unicellular
3	337711	Ochromonas predators_Unicellular
3	412758	Ochromonas predators_Unicellular
3	750469	Ochromonas predators_Unicellular
3	525328	Ochromonas predators_Unicellular
3	525328	Ochromonas predators_Unicellular
3	150094	Ochromonas predators_Unicellular
3	637899	Ochromonas predators_Unicellular
3	375235	Ochromonas predators_Unicellular
3	262664	Ochromonas predators_Unicellular
3	337711	Ochromonas predators_Unicellular
3	375235	Ochromonas predators_Unicellular
3	412758	Ochromonas predators_Unicellular
3	600375	Ochromonas predators_Unicellular
3	375235	Ochromonas predators_Unicellular
3	525328	Ochromonas predators_Unicellular
3	750469	Ochromonas predators_Unicellular
3	600375	Ochromonas predators_Unicellular
3	600375	Ochromonas predators_Unicellular
3	525328	Ochromonas predators_Unicellular
3	450281	Ochromonas predators_Unicellular
3	750469	Ochromonas predators_Unicellular
3	675422	Ochromonas predators_Unicellular
3	900563	Ochromonas predators_Unicellular
3	600375	Ochromonas predators_Unicellular
3	487805	Ochromonas predators_Unicellular
3	562852	Ochromonas predators_Unicellular
3	750469	Ochromonas predators_Unicellular
3	600375	Ochromonas predators_Unicellular
3	562852	Ochromonas predators_Unicellular
3	750469	Ochromonas predators_Unicellular
3	712946	No predators_Multicellular
3	787992	No predators_Multicellular
3	187617	No predators_Multicellular
3	300188	No predators_Multicellular
3	787992	No predators_Multicellular
3	1125704	No predators_Multicellular
3	375235	No predators_Multicellular
3	300188	No predators_Multicellular
3	375235	No predators_Multicellular
3	300188	No predators_Multicellular
3	1088180	No predators_Multicellular
3	450281	No predators_Multicellular
3	1088180	No predators_Multicellular
3	712946	No predators_Multicellular
3	1088180	No predators_Multicellular
3	675422	No predators_Multicellular
3	1463415	No predators_Multicellular
3	1350844	No predators_Multicellular
3	1200750	No predators_Multicellular
3	863039	No predators_Multicellular
3	750469	No predators_Multicellular
3	825516	No predators_Multicellular
3	1013133	No predators_Multicellular
3	1200750	No predators_Multicellular
3	900563	No predators_Multicellular
3	1238274	No predators_Multicellular
3	825516	No predators_Multicellular
3	675422	No predators_Multicellular
3	1050657	No predators_Multicellular
3	900563	No predators_Multicellular
3	562852	Ochromonas predators_Multicellular
3	637899	Ochromonas predators_Multicellular
3	712946	Ochromonas predators_Multicellular
3	787992	Ochromonas predators_Multicellular
3	750469	Ochromonas predators_Multicellular
3	487805	Ochromonas predators_Multicellular
3	412758	Ochromonas predators_Multicellular
3	562852	Ochromonas predators_Multicellular
3	600375	Ochromonas predators_Multicellular
3	337711	Ochromonas predators_Multicellular
3	487805	Ochromonas predators_Multicellular
3	337711	Ochromonas predators_Multicellular
3	750469	Ochromonas predators_Multicellular
3	1554543	Ochromonas predators_Multicellular
3	750469	Ochromonas predators_Multicellular
3	1088180	Ochromonas predators_Multicellular
3	1125704	Ochromonas predators_Multicellular
3	1050657	Ochromonas predators_Multicellular
3	1238274	Ochromonas predators_Multicellular
3	750469	Ochromonas predators_Multicellular
3	1013133	Ochromonas predators_Multicellular
3	1688555	Ochromonas predators_Multicellular
3	825516	Ochromonas predators_Multicellular
3	787992	Ochromonas predators_Multicellular
3	975610	Ochromonas predators_Multicellular
3	863039	Ochromonas predators_Multicellular
3	1050657	Ochromonas predators_Multicellular
3	900563	Ochromonas predators_Multicellular
3	1350844	Ochromonas predators_Multicellular
3	900563	Ochromonas predators_Multicellular

## Sheet: Fig. 3A (Total algae)
Time (hours)	Total algae	Treatment
0	14521575	No predators_Unicellular
0	13958724	No predators_Unicellular
0	15947467	No predators_Unicellular
0	14397748	No predators_Unicellular
0	13395872	No predators_Unicellular
0	14581613	No predators_Unicellular
0	15347091	No predators_Unicellular
0	11144465	No predators_Unicellular
0	15722326	No predators_Unicellular
0	12306191	No predators_Unicellular
0	13658536	No predators_Unicellular
0	12006003	No predators_Unicellular
0	11819136	No predators_Unicellular
0	11369606	No predators_Unicellular
0	13951219	No predators_Unicellular
0	14859287	No predators_Unicellular
0	14857786	No predators_Unicellular
0	13883677	No predators_Unicellular
0	15984990	Daphnia predators_Unicellular
0	14934333	Daphnia predators_Unicellular
0	15082926	Daphnia predators_Unicellular
0	14063789	Daphnia predators_Unicellular
0	14821763	Daphnia predators_Unicellular
0	15759849	Daphnia predators_Unicellular
0	12757973	Daphnia predators_Unicellular
0	15271294	Daphnia predators_Unicellular
0	15234521	Daphnia predators_Unicellular
0	14256285	Daphnia predators_Unicellular
0	12570356	Daphnia predators_Unicellular
0	14521575	Daphnia predators_Unicellular
0	11594746	Daphnia predators_Unicellular
0	9906191	Daphnia predators_Unicellular
0	15422138	Daphnia predators_Unicellular
0	14521575	Daphnia predators_Unicellular
0	14221388	Daphnia predators_Unicellular
0	15647279	Daphnia predators_Unicellular
0	14708818	No predators_Multicellular
0	12833020	No predators_Multicellular
0	18491557	No predators_Multicellular
0	18983114	No predators_Multicellular
0	13579737	No predators_Multicellular
0	9564727	No predators_Multicellular
0	12795497	No predators_Multicellular
0	13283302	No predators_Multicellular
0	14816135	No predators_Multicellular
0	16998123	No predators_Multicellular
0	9754596	No predators_Multicellular
0	14744840	No predators_Multicellular
0	11106941	No predators_Multicellular
0	13807879	No predators_Multicellular
0	12526454	No predators_Multicellular
0	11593621	No predators_Multicellular
0	10466791	No predators_Multicellular
0	13544090	No predators_Multicellular
0	14065290	Daphnia predators_Multicellular
0	16658161	Daphnia predators_Multicellular
0	14216885	Daphnia predators_Multicellular
0	12639399	Daphnia predators_Multicellular
0	15572232	Daphnia predators_Multicellular
0	12983114	Daphnia predators_Multicellular
0	11669793	Daphnia predators_Multicellular
0	12154596	Daphnia predators_Multicellular
0	13318949	Daphnia predators_Multicellular
0	11665290	Daphnia predators_Multicellular
0	16060037	Daphnia predators_Multicellular
0	12607879	Daphnia predators_Multicellular
0	11703939	Daphnia predators_Multicellular
0	12379737	Daphnia predators_Multicellular
0	11587242	Daphnia predators_Multicellular
0	13095684	Daphnia predators_Multicellular
0	13956848	Daphnia predators_Multicellular
0	11977485	Daphnia predators_Multicellular
12	13058161	No predators_Unicellular
12	11932457	No predators_Unicellular
12	16618386	No predators_Unicellular
12	14407879	No predators_Unicellular
12	13654784	No predators_Unicellular
12	14144465	No predators_Unicellular
12	14296435	No predators_Unicellular
12	14742589	No predators_Unicellular
12	14634146	No predators_Unicellular
12	14393996	No predators_Unicellular
12	13545966	No predators_Unicellular
12	9636022	No predators_Unicellular
12	12420262	No predators_Unicellular
12	12908067	No predators_Unicellular
12	13358348	No predators_Unicellular
12	14217260	No predators_Unicellular
12	13283302	No predators_Unicellular
12	11818386	No predators_Unicellular
12	2589118	Daphnia predators_Unicellular
12	3482176	Daphnia predators_Unicellular
12	9193245	Daphnia predators_Unicellular
12	1951219	Daphnia predators_Unicellular
12	4127579	Daphnia predators_Unicellular
12	10165853	Daphnia predators_Unicellular
12	1125703	Daphnia predators_Unicellular
12	2701688	Daphnia predators_Unicellular
12	7279549	Daphnia predators_Unicellular
12	2288930	Daphnia predators_Unicellular
12	6078799	Daphnia predators_Unicellular
12	3189493	Daphnia predators_Unicellular
12	5178236	Daphnia predators_Unicellular
12	4345215	Daphnia predators_Unicellular
12	2887054	Daphnia predators_Unicellular
12	8255159	Daphnia predators_Unicellular
12	5553470	Daphnia predators_Unicellular
12	2363977	Daphnia predators_Unicellular
12	10581613	No predators_Multicellular
12	14595497	No predators_Multicellular
12	11480675	No predators_Multicellular
12	9040525	No predators_Multicellular
12	8250656	No predators_Multicellular
12	15305065	No predators_Multicellular
12	10986866	No predators_Multicellular
12	13807129	No predators_Multicellular
12	7279549	No predators_Multicellular
12	9079924	No predators_Multicellular
12	10501688	No predators_Multicellular
12	11257035	No predators_Multicellular
12	11813883	No predators_Multicellular
12	12152720	No predators_Multicellular
12	10992495	No predators_Multicellular
12	15196998	No predators_Multicellular
12	14518574	No predators_Multicellular
12	20331332	No predators_Multicellular
12	825515	Daphnia predators_Multicellular
12	2735459	Daphnia predators_Multicellular
12	9200750	Daphnia predators_Multicellular
12	2326454	Daphnia predators_Multicellular
12	2326454	Daphnia predators_Multicellular
12	3437148	Daphnia predators_Multicellular
12	4427767	Daphnia predators_Multicellular
12	2814258	Daphnia predators_Multicellular
12	3939962	Daphnia predators_Multicellular
12	2926829	Daphnia predators_Multicellular
12	1913696	Daphnia predators_Multicellular
12	4765478	Daphnia predators_Multicellular
12	5433395	Daphnia predators_Multicellular
12	7598499	Daphnia predators_Multicellular
12	6904315	Daphnia predators_Multicellular
12	2063789	Daphnia predators_Multicellular
12	1951219	Daphnia predators_Multicellular
12	4652908	Daphnia predators_Multicellular

## Sheet: Fig.3A(Prop.of.cells.in.groups)
Time (hours)	Number of cells in groups	Total number of cells	Proportion of cells in groups	Treatment
0	6	387	0.0155039	No predators_No supernatant
0	12	372	0.0322581	No predators_No supernatant
0	14	425	0.0329412	No predators_No supernatant
0	29.7	383.7	0.0774042	No predators_No supernatant
0	18	357	0.0504202	No predators_No supernatant
0	30.6	388.6	0.0787442	No predators_No supernatant
0	6	409	0.0146699	No predators_No supernatant
0	7	297	0.023569	No predators_No supernatant
0	33	419	0.0787589	No predators_No supernatant
0	36.96	327.96	0.112697	No predators_No supernatant
0	32	364	0.0879121	No predators_No supernatant
0	18.96	319.96	0.0592574	No predators_No supernatant
0	21.98	314.98	0.0697822	No predators_No supernatant
0	9	303	0.029703	No predators_No supernatant
0	13.8	371.8	0.0371167	No predators_No supernatant
0	31	396	0.0782828	No predators_No supernatant
0	22.96	395.96	0.0579857	No predators_No supernatant
0	27	370	0.072973	No predators_No supernatant
0	3	426	0.00704225	Daphnia predators_No supernatant
0	18	398	0.0452261	Daphnia predators_No supernatant
0	36.96	401.96	0.0919494	Daphnia predators_No supernatant
0	10.8	374.8	0.0288154	Daphnia predators_No supernatant
0	12	395	0.0303797	Daphnia predators_No supernatant
0	21	420	0.05	Daphnia predators_No supernatant
0	3	340	0.00882353	Daphnia predators_No supernatant
0	34.98	406.98	0.0859502	Daphnia predators_No supernatant
0	35	406	0.0862069	Daphnia predators_No supernatant
0	46.93	379.93	0.123523	Daphnia predators_No supernatant
0	17	335	0.0507463	Daphnia predators_No supernatant
0	3	387	0.00775194	Daphnia predators_No supernatant
0	7	309	0.0226537	Daphnia predators_No supernatant
0	8	264	0.030303	Daphnia predators_No supernatant
0	15	411	0.0364964	Daphnia predators_No supernatant
0	24	387	0.0620155	Daphnia predators_No supernatant
0	18	379	0.0474934	Daphnia predators_No supernatant
0	8	417	0.0191847	Daphnia predators_No supernatant
0	108.99	391.99	0.278043	No predators_Daphnia supernatant
0	93	342	0.27193	No predators_Daphnia supernatant
0	226.8	492.8	0.460227	No predators_Daphnia supernatant
0	234.9	505.9	0.464321	No predators_Daphnia supernatant
0	81.9	361.9	0.226306	No predators_Daphnia supernatant
0	45.9	254.9	0.180071	No predators_Daphnia supernatant
0	133	341	0.390029	No predators_Daphnia supernatant
0	102	354	0.288136	No predators_Daphnia supernatant
0	113.85	394.85	0.288337	No predators_Daphnia supernatant
0	258	453	0.569536	No predators_Daphnia supernatant
0	114.96	259.96	0.442222	No predators_Daphnia supernatant
0	152.95	392.95	0.389235	No predators_Daphnia supernatant
0	78	296	0.263514	No predators_Daphnia supernatant
0	98.98	367.98	0.268982	No predators_Daphnia supernatant
0	96.83	333.83	0.290058	No predators_Daphnia supernatant
0	68.97	308.97	0.223226	No predators_Daphnia supernatant
0	81.94	278.94	0.293755	No predators_Daphnia supernatant
0	106.95	360.95	0.296301	No predators_Daphnia supernatant
0	112.84	374.84	0.301035	Daphnia predators_Daphnia supernatant
0	183.94	443.94	0.414335	Daphnia predators_Daphnia supernatant
0	152.88	378.88	0.403505	Daphnia predators_Daphnia supernatant
0	103.84	336.84	0.308277	Daphnia predators_Daphnia supernatant
0	201	415	0.484337	Daphnia predators_Daphnia supernatant
0	103	346	0.297688	Daphnia predators_Daphnia supernatant
0	57	311	0.18328	Daphnia predators_Daphnia supernatant
0	92.92	323.92	0.286861	Daphnia predators_Daphnia supernatant
0	103.95	354.95	0.292858	Daphnia predators_Daphnia supernatant
0	94.88	310.88	0.305198	Daphnia predators_Daphnia supernatant
0	111	428	0.259346	Daphnia predators_Daphnia supernatant
0	80	336	0.238095	Daphnia predators_Daphnia supernatant
0	107.91	311.91	0.345965	Daphnia predators_Daphnia supernatant
0	70.92	329.92	0.214961	Daphnia predators_Daphnia supernatant
0	98.8	308.8	0.319948	Daphnia predators_Daphnia supernatant
0	70	349	0.200573	Daphnia predators_Daphnia supernatant
0	107.95	371.95	0.290227	Daphnia predators_Daphnia supernatant
0	97.2	319.2	0.304511	Daphnia predators_Daphnia supernatant
12	27	348	0.0775862	No predators_No supernatant
12	33	318	0.103774	No predators_No supernatant
12	47.88	442.88	0.108111	No predators_No supernatant
12	57.97	383.97	0.150975	No predators_No supernatant
12	58.9	363.9	0.161858	No predators_No supernatant
12	53.95	376.95	0.143122	No predators_No supernatant
12	57	381	0.149606	No predators_No supernatant
12	53.89	392.89	0.137163	No predators_No supernatant
12	34	390	0.0871795	No predators_No supernatant
12	60.6	383.6	0.157977	No predators_No supernatant
12	27	361	0.0747922	No predators_No supernatant
12	28.8	256.8	0.11215	No predators_No supernatant
12	39	331	0.117825	No predators_No supernatant
12	35	344	0.101744	No predators_No supernatant
12	67	356	0.188202	No predators_No supernatant
12	62.89	378.89	0.165985	No predators_No supernatant
12	35	354	0.0988701	No predators_No supernatant
12	45.96	314.96	0.145923	No predators_No supernatant
12	12	69	0.173913	Daphnia predators_No supernatant
12	37.8	92.8	0.407328	Daphnia predators_No supernatant
12	32	245	0.130612	Daphnia predators_No supernatant
12	3	52	0.0576923	Daphnia predators_No supernatant
12	28	110	0.254545	Daphnia predators_No supernatant
12	69.92	270.92	0.258084	Daphnia predators_No supernatant
12	0	30	0	Daphnia predators_No supernatant
12	15	72	0.208333	Daphnia predators_No supernatant
12	16	194	0.0824742	Daphnia predators_No supernatant
12	6	61	0.0983607	Daphnia predators_No supernatant
12	25	162	0.154321	Daphnia predators_No supernatant
12	11	85	0.129412	Daphnia predators_No supernatant
12	33	138	0.23913	Daphnia predators_No supernatant
12	19.8	115.8	0.170984	Daphnia predators_No supernatant
12	23.94	76.94	0.311152	Daphnia predators_No supernatant
12	30	220	0.136364	Daphnia predators_No supernatant
12	17	148	0.114865	Daphnia predators_No supernatant
12	15	63	0.238095	Daphnia predators_No supernatant
12	141	282	0.5	No predators_Daphnia supernatant
12	95.97	388.97	0.246729	No predators_Daphnia supernatant
12	93.96	305.96	0.307099	No predators_Daphnia supernatant
12	72.93	240.93	0.302702	No predators_Daphnia supernatant
12	70.88	219.88	0.322358	No predators_Daphnia supernatant
12	152.88	407.88	0.374816	No predators_Daphnia supernatant
12	112.8	292.8	0.385246	No predators_Daphnia supernatant
12	112.96	367.96	0.30699	No predators_Daphnia supernatant
12	79	194	0.407216	No predators_Daphnia supernatant
12	56.98	241.98	0.235474	No predators_Daphnia supernatant
12	114.87	279.87	0.410441	No predators_Daphnia supernatant
12	108	300	0.36	No predators_Daphnia supernatant
12	172.84	314.84	0.548977	No predators_Daphnia supernatant
12	156.87	323.87	0.484361	No predators_Daphnia supernatant
12	82.95	292.95	0.283154	No predators_Daphnia supernatant
12	101	405	0.249383	No predators_Daphnia supernatant
12	84.92	386.92	0.219477	No predators_Daphnia supernatant
12	193.83	541.83	0.357732	No predators_Daphnia supernatant
12	3	22	0.136364	Daphnia predators_Daphnia supernatant
12	21.9	72.9	0.300412	Daphnia predators_Daphnia supernatant
12	193.2	245.2	0.787928	Daphnia predators_Daphnia supernatant
12	23	62	0.370968	Daphnia predators_Daphnia supernatant
12	16	62	0.258065	Daphnia predators_Daphnia supernatant
12	57.6	91.6	0.628821	Daphnia predators_Daphnia supernatant
12	37	118	0.313559	Daphnia predators_Daphnia supernatant
12	39	75	0.52	Daphnia predators_Daphnia supernatant
12	75	105	0.714286	Daphnia predators_Daphnia supernatant
12	24	78	0.307692	Daphnia predators_Daphnia supernatant
12	7	51	0.137255	Daphnia predators_Daphnia supernatant
12	62	127	0.488189	Daphnia predators_Daphnia supernatant
12	73.8	144.8	0.509669	Daphnia predators_Daphnia supernatant
12	121.5	202.5	0.6	Daphnia predators_Daphnia supernatant
12	118	184	0.641304	Daphnia predators_Daphnia supernatant
12	34	55	0.618182	Daphnia predators_Daphnia supernatant
12	15	52	0.288462	Daphnia predators_Daphnia supernatant
12	62	124	0.5	Daphnia predators_Daphnia supernatant

## Sheet: Fig. 3B (Total algae)
Time (hours)	Total algae	Treatment
0	14378987	No predators_Unicellular
0	11647280	No predators_Unicellular
0	11981238	No predators_Unicellular
0	14078799	No predators_Unicellular
0	11744841	No predators_Unicellular
0	12735460	No predators_Unicellular
0	11801126	No predators_Unicellular
0	11763602	No predators_Unicellular
0	12022514	No predators_Unicellular
0	11542214	No predators_Unicellular
0	9253283	No predators_Unicellular
0	7902439	No predators_Unicellular
0	10375235	No predators_Unicellular
0	10393996	No predators_Unicellular
0	6649156	No predators_Unicellular
0	6994371	No predators_Unicellular
0	8649156	No predators_Unicellular
0	9253283	No predators_Unicellular
0	12532833	Small Daphnia_Unicellular
0	12090056	Small Daphnia_Unicellular
0	11767355	Small Daphnia_Unicellular
0	12664165	Small Daphnia_Unicellular
0	12949343	Small Daphnia_Unicellular
0	12780488	Small Daphnia_Unicellular
0	13069418	Small Daphnia_Unicellular
0	13257036	Small Daphnia_Unicellular
0	13977486	Small Daphnia_Unicellular
0	11609756	Small Daphnia_Unicellular
0	11662289	Small Daphnia_Unicellular
0	10078799	Small Daphnia_Unicellular
0	10277674	Small Daphnia_Unicellular
0	9666041	Small Daphnia_Unicellular
0	8266417	Small Daphnia_Unicellular
0	11165103	Small Daphnia_Unicellular
0	9993996	Small Daphnia_Unicellular
0	10681276	Small Daphnia_Unicellular
0	13583490	Medium Daphnia_Unicellular
0	14898912	Medium Daphnia_Unicellular
0	10121764	Medium Daphnia_Unicellular
0	13287054	Medium Daphnia_Unicellular
0	11031895	Medium Daphnia_Unicellular
0	13966229	Medium Daphnia_Unicellular
0	14690432	Medium Daphnia_Unicellular
0	14129831	Medium Daphnia_Unicellular
0	12256886	Medium Daphnia_Unicellular
0	9651032	Medium Daphnia_Unicellular
0	11054409	Medium Daphnia_Unicellular
0	11654409	Medium Daphnia_Unicellular
0	9390619	Medium Daphnia_Unicellular
0	11249531	Medium Daphnia_Unicellular
0	9339587	Medium Daphnia_Unicellular
0	10863039	Medium Daphnia_Unicellular
0	8945591	Medium Daphnia_Unicellular
0	8915572	Medium Daphnia_Unicellular
0	14941839	Large Daphnia_Unicellular
0	16746717	Large Daphnia_Unicellular
0	15470544	Large Daphnia_Unicellular
0	15731707	Large Daphnia_Unicellular
0	14171107	Large Daphnia_Unicellular
0	12265478	Large Daphnia_Unicellular
0	11410882	Large Daphnia_Unicellular
0	13264540	Large Daphnia_Unicellular
0	12971107	Large Daphnia_Unicellular
0	8986867	Large Daphnia_Unicellular
0	9328330	Large Daphnia_Unicellular
0	9981238	Large Daphnia_Unicellular
0	10825516	Large Daphnia_Unicellular
0	10799250	Large Daphnia_Unicellular
0	8116323	Large Daphnia_Unicellular
0	9729831	Large Daphnia_Unicellular
0	7410882	Large Daphnia_Unicellular
0	7673546	Large Daphnia_Unicellular
0	19909944	No predators_Multicellular
0	16984240	No predators_Multicellular
0	14965066	No predators_Multicellular
0	14810507	No predators_Multicellular
0	15210086	No predators_Multicellular
0	15616687	No predators_Multicellular
0	13810278	No predators_Multicellular
0	15376585	No predators_Multicellular
0	16744345	No predators_Multicellular
0	6881801	No predators_Multicellular
0	6397749	No predators_Multicellular
0	8568405	No predators_Multicellular
0	7931707	No predators_Multicellular
0	6845028	No predators_Multicellular
0	7713208	No predators_Multicellular
0	8668143	No predators_Multicellular
0	5139512	No predators_Multicellular
0	6213583	No predators_Multicellular
0	14393246	Small Daphnia_Multicellular
0	14402702	Small Daphnia_Multicellular
0	16294184	Small Daphnia_Multicellular
0	16036773	Small Daphnia_Multicellular
0	15538462	Small Daphnia_Multicellular
0	15438612	Small Daphnia_Multicellular
0	14026266	Small Daphnia_Multicellular
0	11820826	Small Daphnia_Multicellular
0	13460788	Small Daphnia_Multicellular
0	7630769	Small Daphnia_Multicellular
0	8030919	Small Daphnia_Multicellular
0	7519700	Small Daphnia_Multicellular
0	6821764	Small Daphnia_Multicellular
0	7033396	Small Daphnia_Multicellular
0	6181238	Small Daphnia_Multicellular
0	10450882	Small Daphnia_Multicellular
0	9636023	Small Daphnia_Multicellular
0	8156098	Small Daphnia_Multicellular
0	15206266	Medium Daphnia_Multicellular
0	19608705	Medium Daphnia_Multicellular
0	15404203	Medium Daphnia_Multicellular
0	14580113	Medium Daphnia_Multicellular
0	17360263	Medium Daphnia_Multicellular
0	16806754	Medium Daphnia_Multicellular
0	21717223	Medium Daphnia_Multicellular
0	17887711	Medium Daphnia_Multicellular
0	15882552	Medium Daphnia_Multicellular
0	6931932	Medium Daphnia_Multicellular
0	6721426	Medium Daphnia_Multicellular
0	7164878	Medium Daphnia_Multicellular
0	8587242	Medium Daphnia_Multicellular
0	8736765	Medium Daphnia_Multicellular
0	6259662	Medium Daphnia_Multicellular
0	11092458	Medium Daphnia_Multicellular
0	7562852	Medium Daphnia_Multicellular
0	8261914	Medium Daphnia_Multicellular
0	13095272	Large Daphnia_Multicellular
0	17040750	Large Daphnia_Multicellular
0	14643715	Large Daphnia_Multicellular
0	15073321	Large Daphnia_Multicellular
0	16035647	Large Daphnia_Multicellular
0	15215760	Large Daphnia_Multicellular
0	15286266	Large Daphnia_Multicellular
0	15102319	Large Daphnia_Multicellular
0	15763415	Large Daphnia_Multicellular
0	8803565	Large Daphnia_Multicellular
0	5866116	Large Daphnia_Multicellular
0	6535084	Large Daphnia_Multicellular
0	7085553	Large Daphnia_Multicellular
0	7572233	Large Daphnia_Multicellular
0	9022139	Large Daphnia_Multicellular
0	9850957	Large Daphnia_Multicellular
0	8878049	Large Daphnia_Multicellular
0	8255910	Large Daphnia_Multicellular
12	7302064	No predators_Unicellular
12	8315197	No predators_Unicellular
12	9317073	No predators_Unicellular
12	8671670	No predators_Unicellular
12	10237336	No predators_Unicellular
12	9872420	No predators_Unicellular
12	10626642	No predators_Unicellular
12	8266417	No predators_Unicellular
12	8855535	No predators_Unicellular
12	10379325	No predators_Unicellular
12	10206341	No predators_Unicellular
12	11103865	No predators_Unicellular
12	11383114	No predators_Unicellular
12	12762289	No predators_Unicellular
12	12465328	No predators_Unicellular
12	10043771	No predators_Unicellular
12	11110694	No predators_Unicellular
12	10472796	No predators_Unicellular
12	2676923	Small Daphnia_Unicellular
12	2420263	Small Daphnia_Unicellular
12	2508818	Small Daphnia_Unicellular
12	2727955	Small Daphnia_Unicellular
12	1560976	Small Daphnia_Unicellular
12	1437899	Small Daphnia_Unicellular
12	2712045	Small Daphnia_Unicellular
12	2112570	Small Daphnia_Unicellular
12	3331332	Small Daphnia_Unicellular
12	5062664	Small Daphnia_Unicellular
12	4607129	Small Daphnia_Unicellular
12	3314447	Small Daphnia_Unicellular
12	3875722	Small Daphnia_Unicellular
12	3463415	Small Daphnia_Unicellular
12	8194371	Small Daphnia_Unicellular
12	3349719	Small Daphnia_Unicellular
12	2515572	Small Daphnia_Unicellular
12	4317561	Small Daphnia_Unicellular
12	923077	Medium Daphnia_Unicellular
12	1368780	Medium Daphnia_Unicellular
12	836023	Medium Daphnia_Unicellular
12	1212008	Medium Daphnia_Unicellular
12	1409831	Medium Daphnia_Unicellular
12	2477223	Medium Daphnia_Unicellular
12	1863977	Medium Daphnia_Unicellular
12	1383114	Medium Daphnia_Unicellular
12	1555722	Medium Daphnia_Unicellular
12	2715197	Medium Daphnia_Unicellular
12	4974447	Medium Daphnia_Unicellular
12	727955	Medium Daphnia_Unicellular
12	1482176	Medium Daphnia_Unicellular
12	712946	Medium Daphnia_Unicellular
12	5073572	Medium Daphnia_Unicellular
12	2037899	Medium Daphnia_Unicellular
12	2118311	Medium Daphnia_Unicellular
12	487805	Medium Daphnia_Unicellular
12	183865	Large Daphnia_Unicellular
12	213133	Large Daphnia_Unicellular
12	0	Large Daphnia_Unicellular
12	345216	Large Daphnia_Unicellular
12	206379	Large Daphnia_Unicellular
12	397749	Large Daphnia_Unicellular
12	409006	Large Daphnia_Unicellular
12	131332	Large Daphnia_Unicellular
12	540338	Large Daphnia_Unicellular
12	746717	Large Daphnia_Unicellular
12	634146	Large Daphnia_Unicellular
12	427767	Large Daphnia_Unicellular
12	348968	Large Daphnia_Unicellular
12	863039	Large Daphnia_Unicellular
12	480300	Large Daphnia_Unicellular
12	450281	Large Daphnia_Unicellular
12	397749	Large Daphnia_Unicellular
12	412758	Large Daphnia_Unicellular
12	9387242	No predators_Multicellular
12	8947186	No predators_Multicellular
12	8338462	No predators_Multicellular
12	9513471	No predators_Multicellular
12	9139437	No predators_Multicellular
12	10081051	No predators_Multicellular
12	8883152	No predators_Multicellular
12	8337448	No predators_Multicellular
12	8942664	No predators_Multicellular
12	6459362	No predators_Multicellular
12	7529456	No predators_Multicellular
12	7701313	No predators_Multicellular
12	8780638	No predators_Multicellular
12	9135272	No predators_Multicellular
12	8858049	No predators_Multicellular
12	7554251	No predators_Multicellular
12	9560225	No predators_Multicellular
12	15219174	No predators_Multicellular
12	5733583	Small Daphnia_Multicellular
12	2258874	Small Daphnia_Multicellular
12	2395122	Small Daphnia_Multicellular
12	1395122	Small Daphnia_Multicellular
12	3451182	Small Daphnia_Multicellular
12	2508743	Small Daphnia_Multicellular
12	3245779	Small Daphnia_Multicellular
12	2547842	Small Daphnia_Multicellular
12	3347767	Small Daphnia_Multicellular
12	1346191	Small Daphnia_Multicellular
12	2556773	Small Daphnia_Multicellular
12	1609381	Small Daphnia_Multicellular
12	2833696	Small Daphnia_Multicellular
12	2883677	Small Daphnia_Multicellular
12	4334259	Small Daphnia_Multicellular
12	3465666	Small Daphnia_Multicellular
12	3998124	Small Daphnia_Multicellular
12	2744090	Small Daphnia_Multicellular
12	1994597	Medium Daphnia_Multicellular
12	3586116	Medium Daphnia_Multicellular
12	2181576	Medium Daphnia_Multicellular
12	2715947	Medium Daphnia_Multicellular
12	11031895	Medium Daphnia_Multicellular
12	2411107	Medium Daphnia_Multicellular
12	2911820	Medium Daphnia_Multicellular
12	3351595	Medium Daphnia_Multicellular
12	3891932	Medium Daphnia_Multicellular
12	510319	Medium Daphnia_Multicellular
12	1651032	Medium Daphnia_Multicellular
12	1665478	Medium Daphnia_Multicellular
12	427767	Medium Daphnia_Multicellular
12	700188	Medium Daphnia_Multicellular
12	740901	Medium Daphnia_Multicellular
12	956435	Medium Daphnia_Multicellular
12	817111	Medium Daphnia_Multicellular
12	450281	Medium Daphnia_Multicellular
12	484053	Large Daphnia_Multicellular
12	333959	Large Daphnia_Multicellular
12	183865	Large Daphnia_Multicellular
12	754221	Large Daphnia_Multicellular
12	258912	Large Daphnia_Multicellular
12	450281	Large Daphnia_Multicellular
12	472795	Large Daphnia_Multicellular
12	161351	Large Daphnia_Multicellular
12	506567	Large Daphnia_Multicellular
12	731707	Large Daphnia_Multicellular
12	352720	Large Daphnia_Multicellular
12	516886	Large Daphnia_Multicellular
12	1323189	Large Daphnia_Multicellular
12	326454	Large Daphnia_Multicellular
12	611632	Large Daphnia_Multicellular
12	900563	Large Daphnia_Multicellular
12	240150	Large Daphnia_Multicellular
12	487805	Large Daphnia_Multicellular

## Sheet: Fig.3B(Prop.of.cells.in.groups)
Time (hours)	Number of cells in groups	Total number of cells	Proportion of cells in groups	Treatment
0	0.9	383.2	0.00234864	No predators_Unicellular
0	1.8	310.4	0.00579897	No predators_Unicellular
0	0	319.3	0	No predators_Unicellular
0	0.9	375.2	0.00239872	No predators_Unicellular
0	2.4	313	0.00766773	No predators_Unicellular
0	1.8	339.4	0.00530348	No predators_Unicellular
0	0.9	314.5	0.00286169	No predators_Unicellular
0	0.9	313.5	0.00287081	No predators_Unicellular
0	1.8	320.4	0.00561798	No predators_Unicellular
0	0	307.6	0	No predators_Unicellular
0	0	246.6	0	No predators_Unicellular
0	0	210.6	0	No predators_Unicellular
0	0.9	276.5	0.00325497	No predators_Unicellular
0	3	277	0.0108303	No predators_Unicellular
0	0.9	177.2	0.00507901	No predators_Unicellular
0	2.1	186.4	0.0112661	No predators_Unicellular
0	0.9	230.5	0.00390456	No predators_Unicellular
0	0	246.6	0	No predators_Unicellular
0	4	334	0.011976	Small Daphnia_Unicellular
0	7.2	322.2	0.0223464	Small Daphnia_Unicellular
0	0	313.6	0	Small Daphnia_Unicellular
0	0.9	337.5	0.00266667	Small Daphnia_Unicellular
0	1.5	345.1	0.00434657	Small Daphnia_Unicellular
0	0	340.6	0	Small Daphnia_Unicellular
0	3	348.3	0.00861326	Small Daphnia_Unicellular
0	0	353.3	0	Small Daphnia_Unicellular
0	3.5	372.5	0.00939597	Small Daphnia_Unicellular
0	1.8	309.4	0.00581771	Small Daphnia_Unicellular
0	6.5	310.8	0.0209138	Small Daphnia_Unicellular
0	0	268.6	0	Small Daphnia_Unicellular
0	0.9	273.9	0.00328587	Small Daphnia_Unicellular
0	0	257.6	0	Small Daphnia_Unicellular
0	0	220.3	0	Small Daphnia_Unicellular
0	4.55	297.55	0.0152915	Small Daphnia_Unicellular
0	13.04	266.34	0.04896	Small Daphnia_Unicellular
0	6.656	284.656	0.0233826	Small Daphnia_Unicellular
0	9	362	0.0248619	Medium Daphnia_Unicellular
0	21.056	397.056	0.0530303	Medium Daphnia_Unicellular
0	11.745	269.745	0.0435411	Medium Daphnia_Unicellular
0	16.8	354.1	0.0474442	Medium Daphnia_Unicellular
0	12	294	0.0408163	Medium Daphnia_Unicellular
0	0.9	372.2	0.00241805	Medium Daphnia_Unicellular
0	0.9	391.5	0.00229885	Medium Daphnia_Unicellular
0	12.56	376.56	0.0333546	Medium Daphnia_Unicellular
0	9.646	326.646	0.0295304	Medium Daphnia_Unicellular
0	0.9	257.2	0.00349922	Medium Daphnia_Unicellular
0	0	294.6	0	Medium Daphnia_Unicellular
0	4.29	310.59	0.0138124	Medium Daphnia_Unicellular
0	9.66	250.26	0.0385999	Medium Daphnia_Unicellular
0	1.8	299.8	0.006004	Medium Daphnia_Unicellular
0	3.6	248.9	0.0144636	Medium Daphnia_Unicellular
0	1.5	289.5	0.00518135	Medium Daphnia_Unicellular
0	2.4	238.4	0.0100671	Medium Daphnia_Unicellular
0	6	237.6	0.0252525	Medium Daphnia_Unicellular
0	0.9	398.2	0.00226017	Large Daphnia_Unicellular
0	0	446.3	0	Large Daphnia_Unicellular
0	4.29	412.29	0.0104053	Large Daphnia_Unicellular
0	3.25	419.25	0.00775194	Large Daphnia_Unicellular
0	7.36	377.66	0.0194884	Large Daphnia_Unicellular
0	4.875	326.875	0.014914	Large Daphnia_Unicellular
0	1.8	304.1	0.00591911	Large Daphnia_Unicellular
0	3.9	353.5	0.0110325	Large Daphnia_Unicellular
0	6.08	345.68	0.0175885	Large Daphnia_Unicellular
0	0.9	239.5	0.00375783	Large Daphnia_Unicellular
0	0	248.6	0	Large Daphnia_Unicellular
0	0	266	0	Large Daphnia_Unicellular
0	1.5	288.5	0.00519931	Large Daphnia_Unicellular
0	1.2	287.8	0.00416956	Large Daphnia_Unicellular
0	0	216.3	0	Large Daphnia_Unicellular
0	0	259.3	0	Large Daphnia_Unicellular
0	0.9	197.5	0.00455696	Large Daphnia_Unicellular
0	1.2	204.5	0.00586797	Large Daphnia_Unicellular
0	215.6	530.6	0.406332	No predators_Multicellular
0	118.03	452.63	0.260765	No predators_Multicellular
0	72.219	398.819	0.181082	No predators_Multicellular
0	74.1	394.7	0.187738	No predators_Multicellular
0	94.3488	405.349	0.23276	No predators_Multicellular
0	91.1847	416.185	0.219097	No predators_Multicellular
0	64.4439	368.044	0.175098	No predators_Multicellular
0	88.786	409.786	0.216664	No predators_Multicellular
0	136.937	446.237	0.30687	No predators_Multicellular
0	21.8	183.4	0.118866	No predators_Multicellular
0	17.2	170.5	0.10088	No predators_Multicellular
0	42.048	228.348	0.18414	No predators_Multicellular
0	24.38	211.38	0.115337	No predators_Multicellular
0	21.12	182.42	0.115777	No predators_Multicellular
0	33.957	205.557	0.165195	No predators_Multicellular
0	35.706	231.006	0.154567	No predators_Multicellular
0	16.668	136.968	0.121693	No predators_Multicellular
0	33.992	165.592	0.205276	No predators_Multicellular
0	44.98	383.58	0.117264	Small Daphnia_Multicellular
0	71.832	383.832	0.187144	Small Daphnia_Multicellular
0	100.94	434.24	0.232452	Small Daphnia_Multicellular
0	73.78	427.38	0.172633	Small Daphnia_Multicellular
0	89.8	414.1	0.216856	Small Daphnia_Multicellular
0	86.139	411.439	0.20936	Small Daphnia_Multicellular
0	65.2	373.8	0.174425	Small Daphnia_Multicellular
0	70.725	315.025	0.224506	Small Daphnia_Multicellular
0	81.13	358.73	0.226159	Small Daphnia_Multicellular
0	25.76	203.36	0.126672	Small Daphnia_Multicellular
0	39.424	214.024	0.184204	Small Daphnia_Multicellular
0	7.8	200.4	0.0389222	Small Daphnia_Multicellular
0	28.5	181.8	0.156766	Small Daphnia_Multicellular
0	22.44	187.44	0.119718	Small Daphnia_Multicellular
0	17.73	164.73	0.107631	Small Daphnia_Multicellular
0	39.216	278.516	0.140803	Small Daphnia_Multicellular
0	26.5	256.8	0.103193	Small Daphnia_Multicellular
0	34.06	217.36	0.156699	Small Daphnia_Multicellular
0	89.247	405.247	0.220229	Medium Daphnia_Multicellular
0	91.572	522.572	0.175233	Medium Daphnia_Multicellular
0	75.522	410.522	0.183966	Medium Daphnia_Multicellular
0	76.56	388.56	0.197035	Medium Daphnia_Multicellular
0	94.051	462.651	0.203287	Medium Daphnia_Multicellular
0	99.6	447.9	0.222371	Medium Daphnia_Multicellular
0	138.764	578.764	0.239759	Medium Daphnia_Multicellular
0	70.2075	476.707	0.147276	Medium Daphnia_Multicellular
0	73.27	423.27	0.173105	Medium Daphnia_Multicellular
0	24.136	184.736	0.130651	Medium Daphnia_Multicellular
0	18.126	179.126	0.101191	Medium Daphnia_Multicellular
0	20.944	190.944	0.109687	Medium Daphnia_Multicellular
0	31.85	228.85	0.139174	Medium Daphnia_Multicellular
0	28.2348	232.835	0.121265	Medium Daphnia_Multicellular
0	18.52	166.82	0.111018	Medium Daphnia_Multicellular
0	46.314	295.614	0.156671	Medium Daphnia_Multicellular
0	25.55	201.55	0.126768	Medium Daphnia_Multicellular
0	33.58	220.18	0.152512	Medium Daphnia_Multicellular
0	67.989	348.989	0.194817	Large Daphnia_Multicellular
0	125.836	454.136	0.277089	Large Daphnia_Multicellular
0	83.955	390.255	0.215129	Large Daphnia_Multicellular
0	82.404	401.704	0.205136	Large Daphnia_Multicellular
0	80.75	427.35	0.188955	Large Daphnia_Multicellular
0	59.5	405.5	0.146732	Large Daphnia_Multicellular
0	64.779	407.379	0.159014	Large Daphnia_Multicellular
0	65.1768	402.477	0.161939	Large Daphnia_Multicellular
0	94.095	420.095	0.223985	Large Daphnia_Multicellular
0	21.615	234.615	0.0921297	Large Daphnia_Multicellular
0	13.332	156.332	0.08528	Large Daphnia_Multicellular
0	16.56	174.16	0.095085	Large Daphnia_Multicellular
0	13.53	188.83	0.0716518	Large Daphnia_Multicellular
0	23.5	201.8	0.116452	Large Daphnia_Multicellular
0	60.84	240.44	0.253036	Large Daphnia_Multicellular
0	24.528	262.528	0.09343	Large Daphnia_Multicellular
0	19	236.6	0.0803043	Large Daphnia_Multicellular
0	27.02	220.02	0.122807	Large Daphnia_Multicellular
12	0	194.6	0	No predators_Unicellular
12	3	221.6	0.0135379	No predators_Unicellular
12	0	248.3	0	No predators_Unicellular
12	2.1	231.1	0.00908698	No predators_Unicellular
12	4.225	272.825	0.0154861	No predators_Unicellular
12	1.8	263.1	0.00684151	No predators_Unicellular
12	4.6	283.2	0.0162429	No predators_Unicellular
12	0	220.3	0	No predators_Unicellular
12	0	236	0	No predators_Unicellular
12	24.009	276.609	0.0867976	No predators_Unicellular
12	27.999	271.999	0.102938	No predators_Unicellular
12	30.318	295.918	0.102454	No predators_Unicellular
12	23.76	303.36	0.0783228	No predators_Unicellular
12	18.815	340.115	0.0553195	No predators_Unicellular
12	26.201	332.201	0.0788709	No predators_Unicellular
12	23.6665	267.666	0.0884179	No predators_Unicellular
12	19.8	296.1	0.0668693	No predators_Unicellular
12	9.1	279.1	0.0326048	No predators_Unicellular
12	15.34	71.34	0.215027	Small Daphnia_Unicellular
12	26.5	64.5	0.410853	Small Daphnia_Unicellular
12	16.56	66.86	0.247682	Small Daphnia_Unicellular
12	29.4	72.7	0.404402	Small Daphnia_Unicellular
12	7	41.6	0.168269	Small Daphnia_Unicellular
12	18.32	38.32	0.478079	Small Daphnia_Unicellular
12	20.976	72.276	0.290221	Small Daphnia_Unicellular
12	21	56.3	0.373002	Small Daphnia_Unicellular
12	21.78	88.78	0.245326	Small Daphnia_Unicellular
12	38.92	134.92	0.288467	Small Daphnia_Unicellular
12	24.78	122.78	0.201824	Small Daphnia_Unicellular
12	21.03	88.33	0.238084	Small Daphnia_Unicellular
12	23.688	103.288	0.229339	Small Daphnia_Unicellular
12	28	92.3	0.303359	Small Daphnia_Unicellular
12	62.78	218.38	0.287481	Small Daphnia_Unicellular
12	36.27	89.27	0.406296	Small Daphnia_Unicellular
12	20.04	67.04	0.298926	Small Daphnia_Unicellular
12	38.763	115.063	0.336885	Small Daphnia_Unicellular
12	6.6	24.6	0.268293	Medium Daphnia_Unicellular
12	8.878	36.478	0.24338	Medium Daphnia_Unicellular
12	4.68	22.28	0.210054	Medium Daphnia_Unicellular
12	7	32.3	0.216718	Medium Daphnia_Unicellular
12	12.272	37.572	0.326626	Medium Daphnia_Unicellular
12	11.418	66.018	0.172953	Medium Daphnia_Unicellular
12	10.075	49.675	0.202818	Medium Daphnia_Unicellular
12	6.86	36.86	0.18611	Medium Daphnia_Unicellular
12	11.16	41.46	0.269175	Medium Daphnia_Unicellular
12	7.06	72.36	0.0975677	Medium Daphnia_Unicellular
12	40.269	132.569	0.303759	Medium Daphnia_Unicellular
12	1.8	19.4	0.0927835	Medium Daphnia_Unicellular
12	8	39.5	0.202532	Medium Daphnia_Unicellular
12	0	19	0	Medium Daphnia_Unicellular
12	41.9107	135.211	0.309966	Medium Daphnia_Unicellular
12	23.01	54.31	0.423679	Medium Daphnia_Unicellular
12	17.853	56.453	0.316245	Medium Daphnia_Unicellular
12	0	13	0	Medium Daphnia_Unicellular
12	0.9	4.9	0.183673	Large Daphnia_Unicellular
12	1.38	5.68	0.242958	Large Daphnia_Unicellular
12	0	0	0	Large Daphnia_Unicellular
12	0.9	9.2	0.0978261	Large Daphnia_Unicellular
12	1.5	5.5	0.272727	Large Daphnia_Unicellular
12	3	10.6	0.283019	Large Daphnia_Unicellular
12	3.3	10.9	0.302752	Large Daphnia_Unicellular
12	1.2	3.5	0.342857	Large Daphnia_Unicellular
12	2.4	14.4	0.166667	Large Daphnia_Unicellular
12	6.6	19.9	0.331658	Large Daphnia_Unicellular
12	0.9	16.9	0.0532544	Large Daphnia_Unicellular
12	2.1	11.4	0.184211	Large Daphnia_Unicellular
12	0	9.3	0	Large Daphnia_Unicellular
12	10	23	0.434783	Large Daphnia_Unicellular
12	4.2	12.8	0.328125	Large Daphnia_Unicellular
12	0	12	0	Large Daphnia_Unicellular
12	4.3	10.6	0.40566	Large Daphnia_Unicellular
12	4	11	0.363636	Large Daphnia_Unicellular
12	38.17	250.17	0.152576	No predators_Multicellular
12	45.4425	238.442	0.190581	No predators_Multicellular
12	23.22	222.22	0.104491	No predators_Multicellular
12	39.534	253.534	0.155932	No predators_Multicellular
12	52.266	243.566	0.214587	No predators_Multicellular
12	48.36	268.66	0.180004	No predators_Multicellular
12	36.736	236.736	0.155177	No predators_Multicellular
12	11.193	222.193	0.0503751	No predators_Multicellular
12	45.322	238.322	0.190171	No predators_Multicellular
12	43.142	172.142	0.250619	No predators_Multicellular
12	60.36	200.66	0.300807	No predators_Multicellular
12	53.94	205.24	0.262814	No predators_Multicellular
12	88.704	234.004	0.37907	No predators_Multicellular
12	71.155	243.455	0.292272	No predators_Multicellular
12	50.067	236.067	0.212088	No predators_Multicellular
12	54.7208	201.321	0.271809	No predators_Multicellular
12	60.78	254.78	0.238559	No predators_Multicellular
12	129.591	405.591	0.319512	No predators_Multicellular
12	89.2	152.8	0.58377	Small Daphnia_Multicellular
12	23.199	60.199	0.385372	Small Daphnia_Multicellular
12	25.83	63.83	0.404669	Small Daphnia_Multicellular
12	8.88	37.18	0.238838	Small Daphnia_Multicellular
12	52.374	91.974	0.569444	Small Daphnia_Multicellular
12	30.558	66.858	0.457058	Small Daphnia_Multicellular
12	37.2	86.5	0.430058	Small Daphnia_Multicellular
12	16.6	67.9	0.244477	Small Daphnia_Multicellular
12	19.918	89.218	0.223251	Small Daphnia_Multicellular
12	12.576	35.876	0.350541	Small Daphnia_Multicellular
12	39.138	68.138	0.574393	Small Daphnia_Multicellular
12	17.29	42.89	0.403124	Small Daphnia_Multicellular
12	34.518	75.518	0.457083	Small Daphnia_Multicellular
12	26.85	76.85	0.349382	Small Daphnia_Multicellular
12	54.908	115.508	0.475361	Small Daphnia_Multicellular
12	48.06	92.36	0.520355	Small Daphnia_Multicellular
12	60.55	106.55	0.568278	Small Daphnia_Multicellular
12	40.83	73.13	0.558321	Small Daphnia_Multicellular
12	11.856	53.156	0.223042	Medium Daphnia_Multicellular
12	57.27	95.57	0.599247	Medium Daphnia_Multicellular
12	22.539	58.139	0.387674	Medium Daphnia_Multicellular
12	28.38	72.38	0.392097	Medium Daphnia_Multicellular
12	241.4	294	0.821088	Medium Daphnia_Multicellular
12	14.656	64.256	0.228088	Medium Daphnia_Multicellular
12	16	77.6	0.206186	Medium Daphnia_Multicellular
12	46.32	89.32	0.518585	Medium Daphnia_Multicellular
12	55.12	103.72	0.531431	Medium Daphnia_Multicellular
12	0	13.6	0	Medium Daphnia_Multicellular
12	23	44	0.522727	Medium Daphnia_Multicellular
12	11.385	44.385	0.256506	Medium Daphnia_Multicellular
12	1.8	11.4	0.157895	Medium Daphnia_Multicellular
12	9.66	18.66	0.517685	Medium Daphnia_Multicellular
12	4.745	19.745	0.240314	Medium Daphnia_Multicellular
12	10.189	25.489	0.399741	Medium Daphnia_Multicellular
12	8.476	21.776	0.389236	Medium Daphnia_Multicellular
12	4	12	0.333333	Medium Daphnia_Multicellular
12	3.6	12.9	0.27907	Large Daphnia_Multicellular
12	0.9	8.9	0.101124	Large Daphnia_Multicellular
12	0.9	4.9	0.183673	Large Daphnia_Multicellular
12	1.8	20.1	0.0895522	Large Daphnia_Multicellular
12	0.9	6.9	0.130435	Large Daphnia_Multicellular
12	0	12	0	Large Daphnia_Multicellular
12	6	12.6	0.47619	Large Daphnia_Multicellular
12	0	4.3	0	Large Daphnia_Multicellular
12	1.5	13.5	0.111111	Large Daphnia_Multicellular
12	9.9	19.5	0.507692	Large Daphnia_Multicellular
12	2.4	9.4	0.255319	Large Daphnia_Multicellular
12	2.475	13.775	0.179673	Large Daphnia_Multicellular
12	18.963	35.263	0.537759	Large Daphnia_Multicellular
12	2.4	8.7	0.275862	Large Daphnia_Multicellular
12	6.3	16.3	0.386503	Large Daphnia_Multicellular
12	14.4	24	0.6	Large Daphnia_Multicellular
12	1.8	6.4	0.28125	Large Daphnia_Multicellular
12	6	13	0.461538	Large Daphnia_Multicellular

## Sheet: Fig. 3C
Time (hours)	Number of cells from the multicellular culture	Total number of cells	Proportion of cells from the multicellular culture	Treatment
0	15	45.6	0.328947	Multicellular (violet):Unicellular (green) algal culture
0	20	47	0.425532	Multicellular (violet):Unicellular (green) algal culture
0	20	55.6	0.359712	Multicellular (violet):Unicellular (green) algal culture
0	4	13.6	0.294118	Multicellular (violet):Unicellular (green) algal culture
0	20.3	55.9	0.363148	Multicellular (violet):Unicellular (green) algal culture
0	17.6	39.9	0.441103	Multicellular (violet):Unicellular (green) algal culture
0	23	55	0.418182	Multicellular (violet):Unicellular (green) algal culture
0	14	43	0.325581	Multicellular (violet):Unicellular (green) algal culture
0	26.6	63.2	0.420886	Multicellular (violet):Unicellular (green) algal culture
0	16	56	0.285714	Multicellular (violet):Unicellular (green) algal culture
0	25.6	71.9	0.35605	Multicellular (violet):Unicellular (green) algal culture
0	25	61	0.409836	Multicellular (violet):Unicellular (green) algal culture
0	19.3	55.9	0.345259	Multicellular (violet):Unicellular (green) algal culture
0	33.3	75.3	0.442231	Multicellular (violet):Unicellular (green) algal culture
0	24.3	53.6	0.453358	Multicellular (violet):Unicellular (green) algal culture
0	20.3	64.9	0.312789	Multicellular (violet):Unicellular (green) algal culture
0	19.6	56.9	0.344464	Multicellular (violet):Unicellular (green) algal culture
0	21.3	56.9	0.374341	Multicellular (violet):Unicellular (green) algal culture
3	10.3	36.6	0.281421	Multicellular (violet):Unicellular (green) algal culture
3	11	22	0.5	Multicellular (violet):Unicellular (green) algal culture
3	7.3	30.3	0.240924	Multicellular (violet):Unicellular (green) algal culture
3	10.3	30.9	0.333333	Multicellular (violet):Unicellular (green) algal culture
3	11.3	30.6	0.369281	Multicellular (violet):Unicellular (green) algal culture
3	4.3	17.3	0.248555	Multicellular (violet):Unicellular (green) algal culture
3	15.6	49.6	0.314516	Multicellular (violet):Unicellular (green) algal culture
3	13.6	34.9	0.389685	Multicellular (violet):Unicellular (green) algal culture
3	15	48.6	0.308642	Multicellular (violet):Unicellular (green) algal culture
3	8.3	40.9	0.202934	Multicellular (violet):Unicellular (green) algal culture
3	12.6	41.9	0.300716	Multicellular (violet):Unicellular (green) algal culture
3	18.3	53.3	0.34334	Multicellular (violet):Unicellular (green) algal culture
3	11.3	37.3	0.302949	Multicellular (violet):Unicellular (green) algal culture
3	21.6	48.9	0.441718	Multicellular (violet):Unicellular (green) algal culture
3	18.6	59.2	0.314189	Multicellular (violet):Unicellular (green) algal culture
3	14	41	0.341463	Multicellular (violet):Unicellular (green) algal culture
3	15.3	41.6	0.367788	Multicellular (violet):Unicellular (green) algal culture
3	18	36.6	0.491803	Multicellular (violet):Unicellular (green) algal culture
0	22	46.3	0.475162	Multicellular (green):Unicellular (violet) algal culture
0	28.3	72.6	0.389807	Multicellular (green):Unicellular (violet) algal culture
0	25.3	67.3	0.375929	Multicellular (green):Unicellular (violet) algal culture
0	38.3	69.3	0.55267	Multicellular (green):Unicellular (violet) algal culture
0	31	69.6	0.445402	Multicellular (green):Unicellular (violet) algal culture
0	38.6	91.6	0.421397	Multicellular (green):Unicellular (violet) algal culture
0	27	45.6	0.592105	Multicellular (green):Unicellular (violet) algal culture
0	48.3	107.3	0.45014	Multicellular (green):Unicellular (violet) algal culture
0	37	81	0.45679	Multicellular (green):Unicellular (violet) algal culture
0	33.3	99.3	0.335347	Multicellular (green):Unicellular (violet) algal culture
0	40	90	0.444444	Multicellular (green):Unicellular (violet) algal culture
0	23.3	65.9	0.353566	Multicellular (green):Unicellular (violet) algal culture
0	38.6	83.9	0.460072	Multicellular (green):Unicellular (violet) algal culture
0	30	90.6	0.331126	Multicellular (green):Unicellular (violet) algal culture
0	41.3	96.6	0.427536	Multicellular (green):Unicellular (violet) algal culture
0	35.3	109.9	0.321201	Multicellular (green):Unicellular (violet) algal culture
0	12	42.6	0.28169	Multicellular (green):Unicellular (violet) algal culture
0	35.3	80.6	0.437965	Multicellular (green):Unicellular (violet) algal culture
3	14	26.3	0.532319	Multicellular (green):Unicellular (violet) algal culture
3	18.6	46.9	0.396588	Multicellular (green):Unicellular (violet) algal culture
3	30.3	58.3	0.519726	Multicellular (green):Unicellular (violet) algal culture
3	24.3	51.6	0.47093	Multicellular (green):Unicellular (violet) algal culture
3	31.3	73.9	0.423545	Multicellular (green):Unicellular (violet) algal culture
3	18	41	0.439024	Multicellular (green):Unicellular (violet) algal culture
3	26	56.3	0.461812	Multicellular (green):Unicellular (violet) algal culture
3	24	58.3	0.411664	Multicellular (green):Unicellular (violet) algal culture
3	32.6	86.6	0.376443	Multicellular (green):Unicellular (violet) algal culture
3	28	59.6	0.469799	Multicellular (green):Unicellular (violet) algal culture
3	36	80.6	0.44665	Multicellular (green):Unicellular (violet) algal culture
3	33.6	88.9	0.377953	Multicellular (green):Unicellular (violet) algal culture
3	37	68.6	0.539359	Multicellular (green):Unicellular (violet) algal culture
3	30	77.3	0.388098	Multicellular (green):Unicellular (violet) algal culture
3	36.3	94.9	0.382508	Multicellular (green):Unicellular (violet) algal culture
3	24.6	47.6	0.516807	Multicellular (green):Unicellular (violet) algal culture
3	38	68.6	0.553936	Multicellular (green):Unicellular (violet) algal culture
3	32.3	59.9	0.539232	Multicellular (green):Unicellular (violet) algal culture

## Sheet: Fig. 4B
Time (hours)	Number of cells in groups	Total number of cells	Proportion of cells in groups	Treatment
0	35	440	0.0795455	Dark_No supernatant
0	12	393	0.0305344	Dark_No supernatant
0	7	412	0.0169903	Dark_No supernatant
0	14	429	0.032634	Dark_No supernatant
0	6	378	0.015873	Dark_No supernatant
0	20	401	0.0498753	Light_No supernatant
0	27	416	0.0649038	Light_No supernatant
0	10	395	0.0253165	Light_No supernatant
0	14	427	0.0327869	Light_No supernatant
0	5	415	0.0120482	Light_No supernatant
0	22	394	0.0558376	Dark_Daphnia supernatant
0	18	404	0.0445545	Dark_Daphnia supernatant
0	10	379	0.0263852	Dark_Daphnia supernatant
0	7	366	0.0191257	Dark_Daphnia supernatant
0	9	411	0.0218978	Dark_Daphnia supernatant
0	0	399	0	Light_Daphnia supernatant
0	10	407	0.02457	Light_Daphnia supernatant
0	4	352	0.0113636	Light_Daphnia supernatant
0	0	369	0	Light_Daphnia supernatant
0	2	433	0.00461894	Light_Daphnia supernatant
96	54	718	0.0752089	Dark_No supernatant
96	36	684	0.0526316	Dark_No supernatant
96	62	702	0.0883191	Dark_No supernatant
96	24	660	0.0363636	Dark_No supernatant
96	50	676	0.0739645	Dark_No supernatant
96	56	706	0.0793201	Light_No supernatant
96	154	884	0.174208	Light_No supernatant
96	46	824	0.0558252	Light_No supernatant
96	68	788	0.0862944	Light_No supernatant
96	22	998	0.0220441	Light_No supernatant
96	310	360	0.861111	Dark_Daphnia supernatant
96	128	162	0.790123	Dark_Daphnia supernatant
96	288	354	0.813559	Dark_Daphnia supernatant
96	254	290	0.875862	Dark_Daphnia supernatant
96	146	198	0.737374	Dark_Daphnia supernatant
96	546	924	0.590909	Light_Daphnia supernatant
96	672	788	0.852921	Light_Daphnia supernatant
96	642	846	0.758865	Light_Daphnia supernatant
96	954	1402	0.680456	Light_Daphnia supernatant
96	558	670	0.832836	Light_Daphnia supernatant

## Sheet: Fig. 4C
Time (hours)	Total algae	Treatment
0	16510319	Dark_No supernatant
0	14746717	Dark_No supernatant
0	15459662	Dark_No supernatant
0	16097561	Dark_No supernatant
0	14183865	Dark_No supernatant
0	15046904	Light_No supernatant
0	15609756	Light_No supernatant
0	14821764	Light_No supernatant
0	16022514	Light_No supernatant
0	15572233	Light_No supernatant
0	14784240	Dark_Daphnia supernatant
0	15159475	Dark_Daphnia supernatant
0	14221388	Dark_Daphnia supernatant
0	13733583	Dark_Daphnia supernatant
0	15422139	Dark_Daphnia supernatant
0	14971857	Light_Daphnia supernatant
0	15272045	Light_Daphnia supernatant
0	13208255	Light_Daphnia supernatant
0	13846154	Light_Daphnia supernatant
0	16247655	Light_Daphnia supernatant
96	26941839	Dark_No supernatant
96	25666041	Dark_No supernatant
96	26341463	Dark_No supernatant
96	24765478	Dark_No supernatant
96	25365854	Dark_No supernatant
96	26491557	Light_No supernatant
96	33170732	Light_No supernatant
96	30919325	Light_No supernatant
96	29568480	Light_No supernatant
96	37448405	Light_No supernatant
96	13508443	Dark_Daphnia supernatant
96	6078799	Dark_Daphnia supernatant
96	13283302	Dark_Daphnia supernatant
96	10881801	Dark_Daphnia supernatant
96	7429644	Dark_Daphnia supernatant
96	34671670	Light_Daphnia supernatant
96	29568480	Light_Daphnia supernatant
96	31744841	Light_Daphnia supernatant
96	52607880	Light_Daphnia supernatant
96	25140713	Light_Daphnia supernatant

[truncated: 6 more sheets: Fig. 5B, Fig. 5C, Fig. 6, Fig. 7A, Fig. 7B, Fig. S3]
